# Supplementary material for: Metabolomic analysis of a selective ABCA1 inducer in obesogenic challenge provides a rationale for therapeutic development
Source: PubMed Central journal article supplement — eBioMedicine. 2021 Mar 19;66:103287. doi: 10.1016/j.ebiom.2021.103287 (PMC8010624; doi:10.1016/j.ebiom.2021.103287), 2021-03-19

# Uncropped western blot images used in Figure 1F

pAkt T308  
(60 kDa)

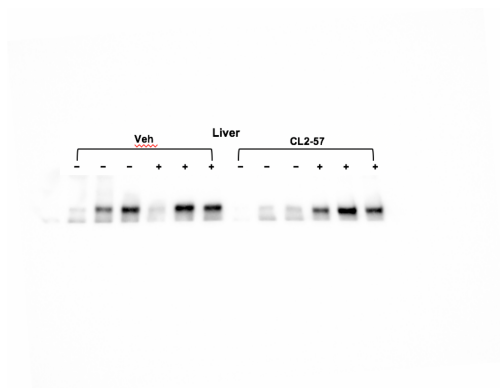

pAkt S473  
(60 kDa)

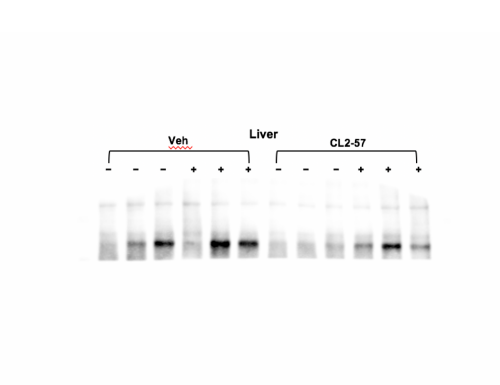

pan Akt  
(60 kDa)

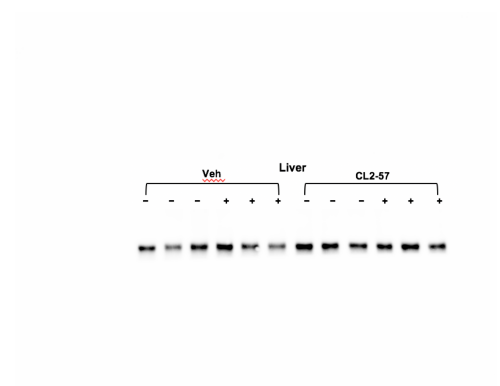

Actin  
(42 kDa)

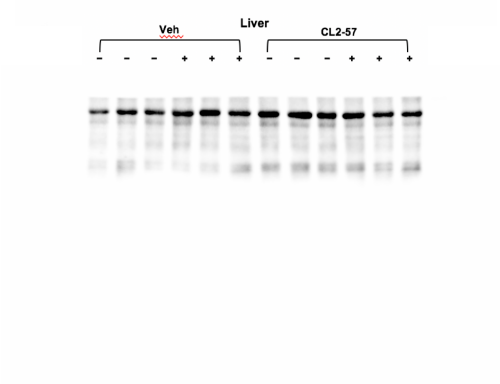

Ladder images for gels in Figure 1F

pAkt T308  
(60 kDa)

150  
100  
75  
50

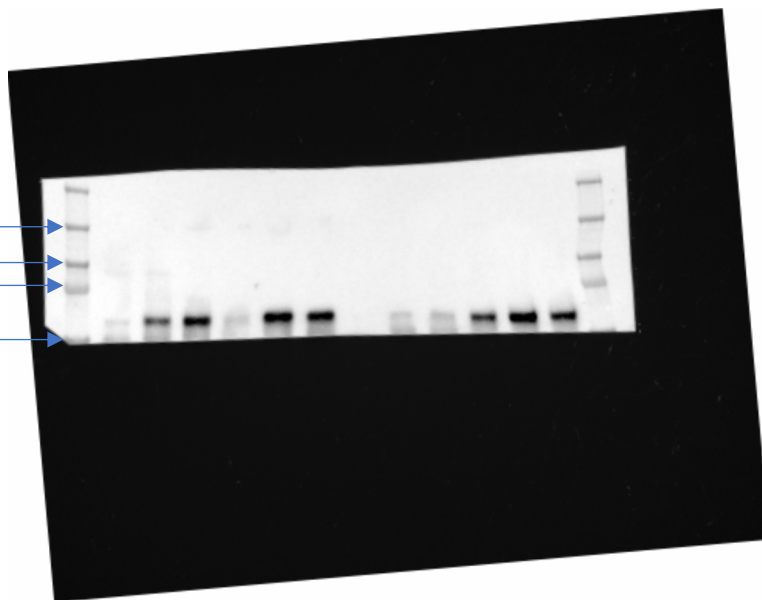

pan Akt  
(60 kDa)

150  
100  
75  
50

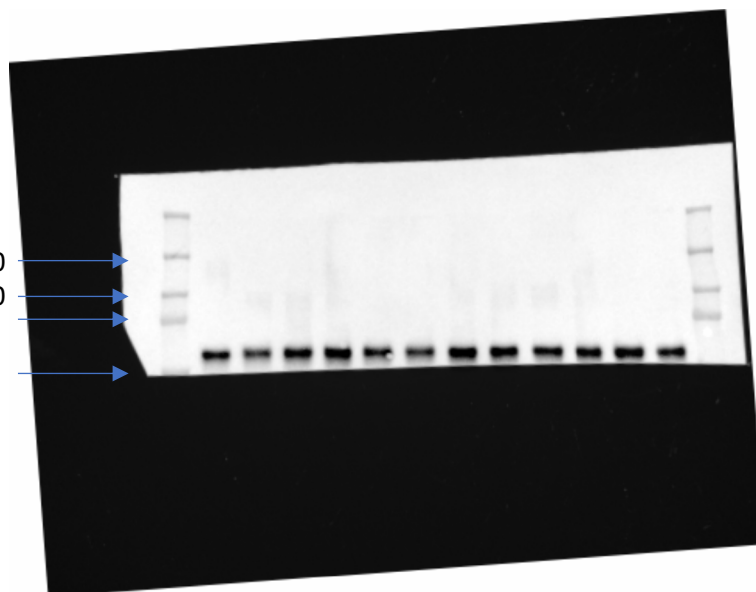

Full unedited western blot images used in Figure 1H

pAkt T308  
(60 kDa)

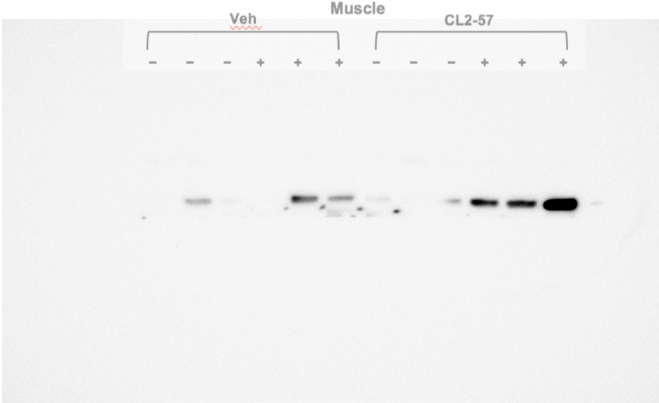

pAkt S473  
(60 kDa)

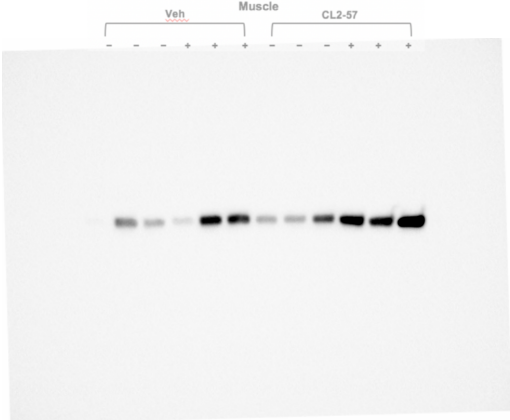

pan Akt  
(60 kDa)

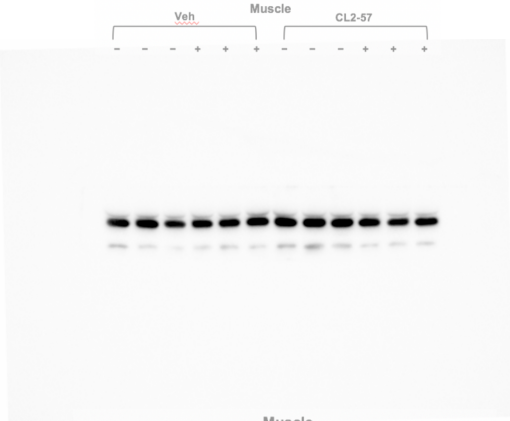

GAPDH  
(37 kDa)

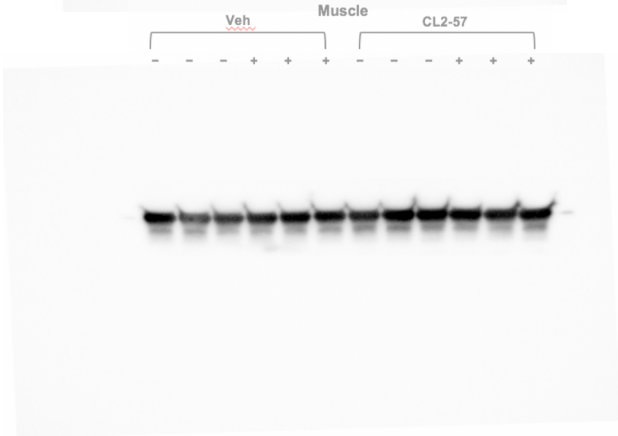

# Ladder images for gels in Figure 1H

pAkt T308  
(60 kDa)

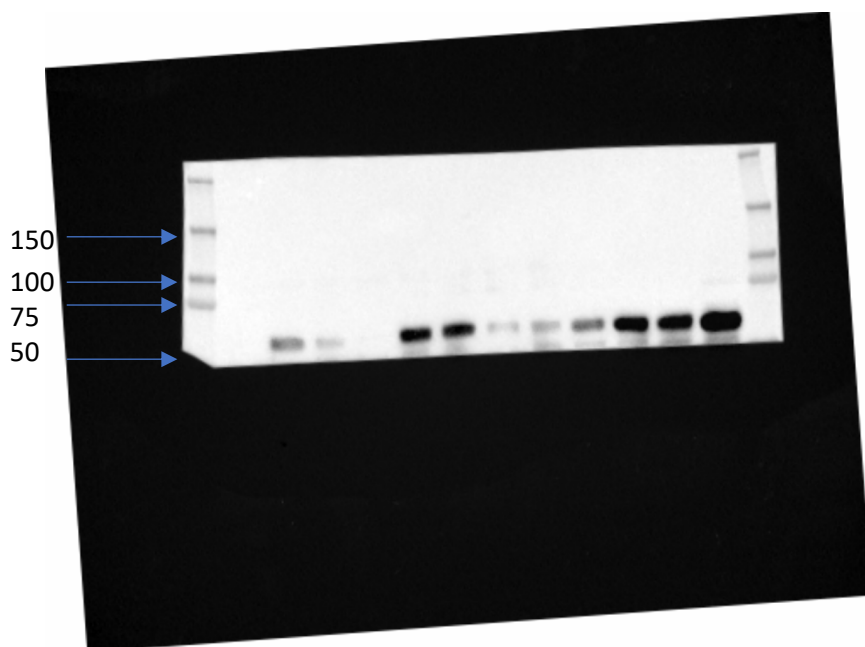

pAkt S473  
(60 kDa)

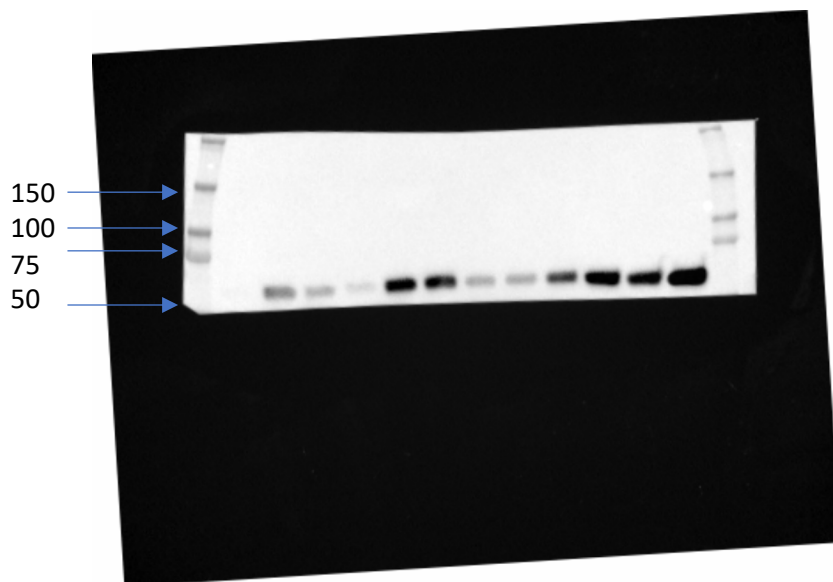

Full unedited western blot images used in Figure 1J

pAkt T308  
(60 kDa)

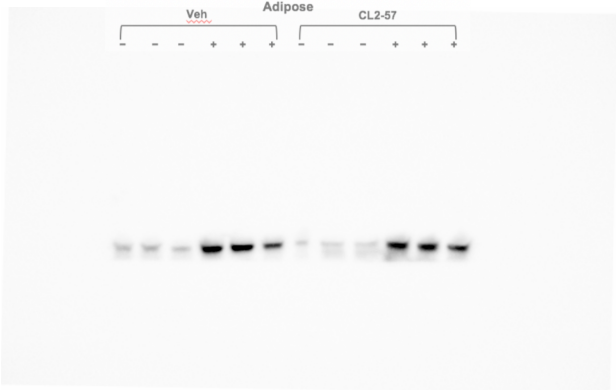

pAkt S473  
(60 kDa)

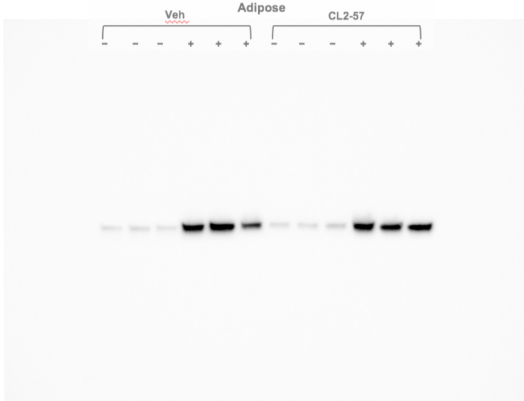

pan Akt  
(60 kDa)

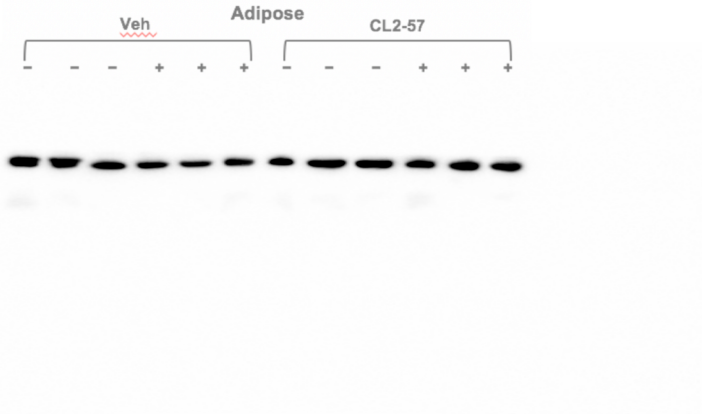

Actin  
(42 kDa)

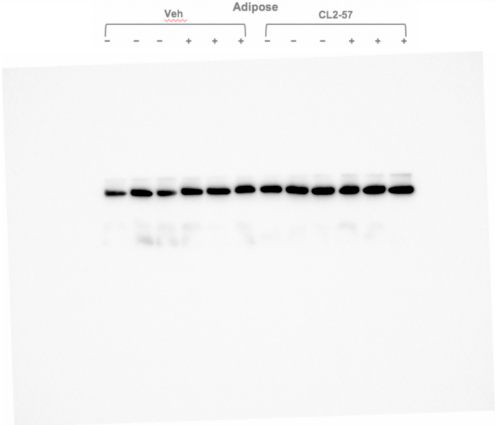

# Ladder images for gels in Figure 1J

pAkt T308  
(60 kDa)

150  
100  
75  
50

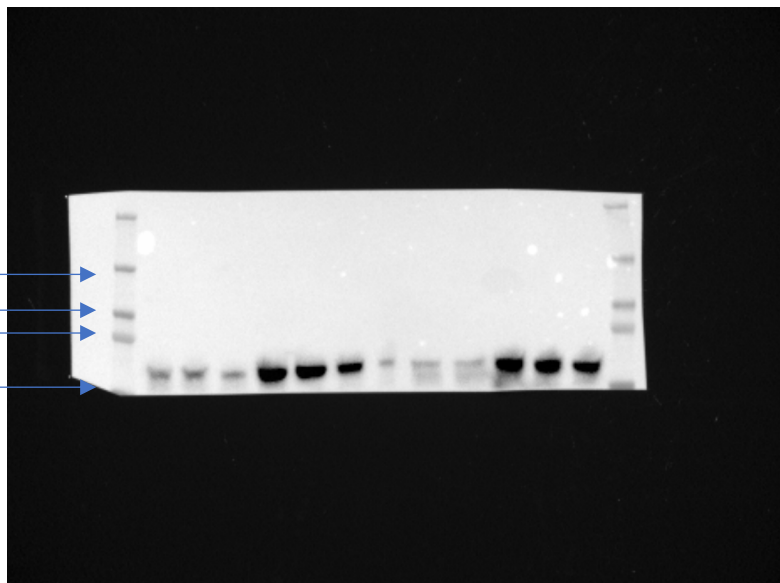

pAkt S473  
(60 kDa)

150  
100  
75  
50

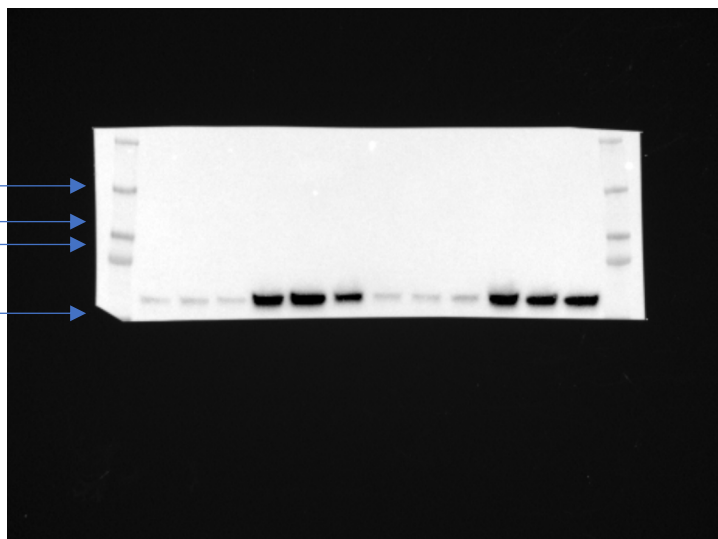

# Uncropped western blot images used in Figure 6

**ABCA1  
(254 kDa)**

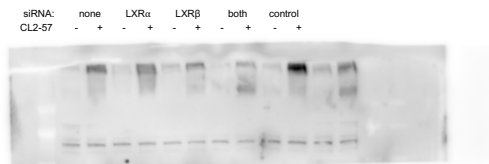

Two rightmost wells were a different treatment and were not included in Figure 6

**GAPDH  
(37 kDa)**

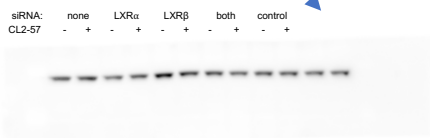

Ladder image for western blot in Figure 6

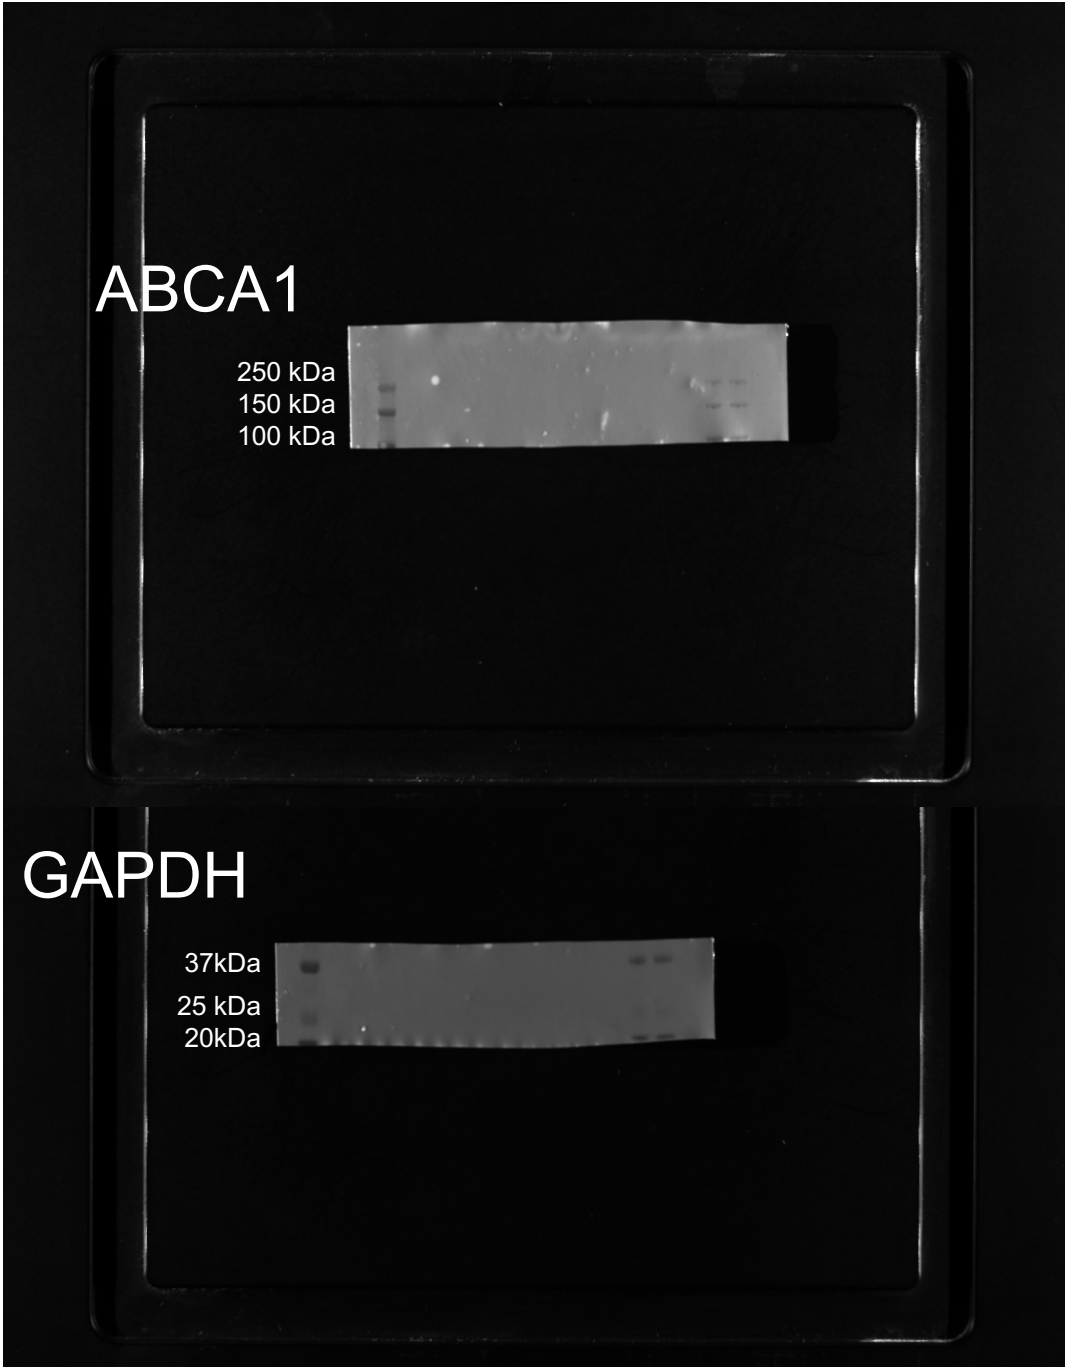



Full unedited western blot images used in Figure S1

ABCA1  
(254 kDa)

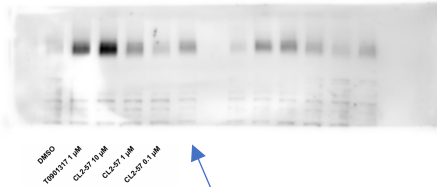

Well #6 was from a different treatment and was not included in Figure S1

GAPDH  
(37 kDa)

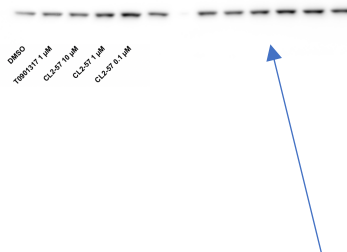

Right half of gel is duplicates of same treatments on left, collected from a different 6-well plate

# Ladder images for western blot in Figure S1

**ABCA1**

250 kDa  
150 kDa  
100 kDa

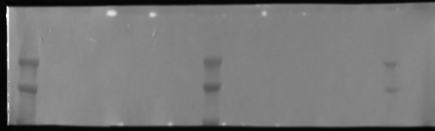

**GAPDH**

50 kDa  
37kDa

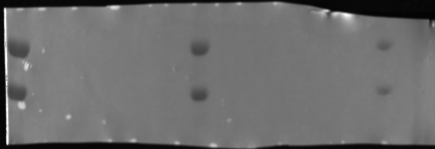

Full unedited western blot images used in Figure S3

ABCA1  
(254 kDa)

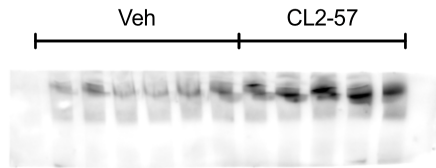

SREBP1c

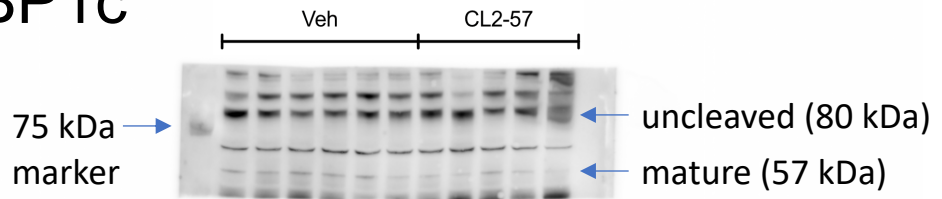

GAPDH  
(37 kDa)

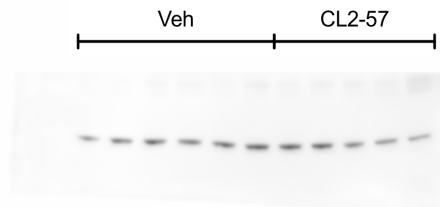

# Ladder images for gels in Figure S3

ABCA1

250 kDa  
150 kDa

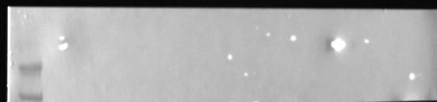

GAPDH

50 kDa  
37 kDa

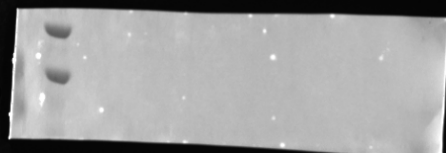

# Ladder images for gels in Figure S3

**SREBP1c**

100 kDa

75 kDa

50 kDa

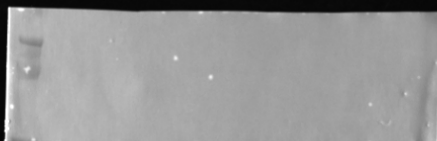

Supplement: mmc2.pdf [file mmc2.pdf]
